# Supplementary material for: muscat detects subpopulation-specific state transitions from multi-sample multi-condition single-cell transcriptomics data
Source: PubMed Central journal article supplement (PMC7705760; doi:10.1038/s41467-020-19894-4), 2020-11-30
Supplement: 41467_2020_19894_MOESM1_ESM.pdf [file 41467_2020_19894_MOESM1_ESM.pdf]

## **Supplementary material:**

### **muscat detects subpopulation-specific state transitions from multi-sample multi-condition single-cell transcriptomics data**

Helena L. Crowell<sup>1,2</sup>, Charlotte Sonesson<sup>1,2,3,\*</sup>, Pierre-Luc Germain<sup>1,4,\*</sup>, Daniela Calini<sup>5</sup>, Ludovic Collin<sup>5</sup>, Catarina Raposo<sup>5</sup>, Dheeraj Malhotra<sup>5</sup> & Mark D. Robinson<sup>1,2</sup>

<sup>1</sup>*Department of Molecular Life Sciences, University of Zurich, Zurich, Switzerland*

<sup>2</sup>*SIB Swiss Institute of Bioinformatics, Zurich, Switzerland*

<sup>3</sup>*Present address: Friedrich Miescher Institute for Biomedical Research and SIB Swiss Institute of Bioinformatics, Basel, Switzerland*

<sup>4</sup>*D-HEST Institute for Neuroscience, Swiss Federal Institute of Technology, Zurich, Switzerland*

<sup>5</sup>*F. Hoffmann-La Roche Ltd, Pharma Research and Early Development, Neuroscience, Ophthalmology and Rare Diseases, Roche Innovation Center Basel, Basel, Switzerland*

*\* These authors contributed equally.*

| Method ID                      | Input data                            | Agg. | Model level               | Ref.                             |
|--------------------------------|---------------------------------------|------|---------------------------|----------------------------------|
| edgeR.sum(counts)              | counts                                | ✓    | cluster-sample PBs        | Robinson et al. <sup>1</sup>     |
| edgeR.sum(scalecpm)            | LS scaled pseudobulk CPM              | ✓    | cluster-sample PBs        |                                  |
| limma-voom.sum(counts)         | counts                                | ✓    | cluster-sample PBs        | Ritchie et al. <sup>2</sup>      |
| limma-trend.mean(logcounts)    | log <sub>2</sub> LS normalized counts | ✓    | cluster-sample PBs        |                                  |
| limma-trend.mean(vstresiduals) | VST residuals                         | ✓    | cluster-sample PBs        |                                  |
| MM-dream                       | counts                                | ✗    | SCs; cluster-level        | Hoffman and Schadt <sup>3</sup>  |
| MM-dream2                      | counts                                | ✗    | SCs; cluster-level        | Hoffman and Roussos <sup>4</sup> |
| MM-nbinom                      | counts                                | ✗    | SCs; cluster-level        |                                  |
| MM-vst                         | VST residuals                         | ✗    | SCs; cluster-level        |                                  |
| scDD.logcounts                 | log <sub>2</sub> LS normalized counts | ✗    | SCs; cluster-level        | Korthauer et al. <sup>5</sup>    |
| scDD.vstresiduals              | VST residuals                         | ✗    | SCs; cluster-level        |                                  |
| MAST.logcounts                 | log <sub>2</sub> LS normalized counts | ✗    | SCs; cluster-level        | Finak et al. <sup>6</sup>        |
| AD-gid.logcounts               | log <sub>2</sub> LS normalized counts | ✗    | SCs; cluster-group level  | Scholz and Stephens <sup>7</sup> |
| AD-gid.vstresiduals            | VST residuals                         | ✗    | SCs; cluster-group level  |                                  |
| AD-sid.logcounts               | log <sub>2</sub> LS normalized counts | ✗    | SCs; cluster-sample level |                                  |
| AD-sid.vstresiduals            | VST residuals                         | ✗    | SCs; cluster-sample level |                                  |

**Supplementary Table 1: Overview of compared DS analysis methods.** From left to right: Method identifier as depicted in all figures; input data; whether data is aggregated or not; the levels at which differential testing is performed; reference. (Agg. = aggregation, CPM = counts per million, LS = library size, VST = variance stabilizing transformation, PBs = pseudobulks, SCs = single cells)

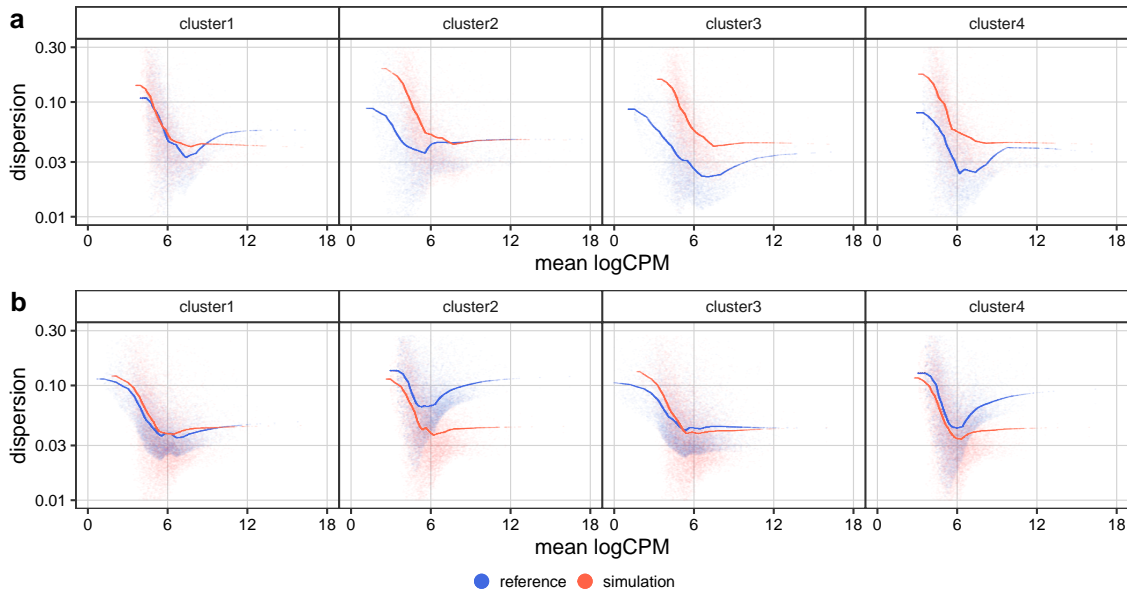

**Supplementary Figure 1: Comparison of pseudobulk-level mean-dispersion estimates for reference vs. simulated data, separated by subpopulation.** Lines correspond to trended dispersion estimates; faded points represent tag-wise dispersion estimates. Lower (1%) and upper (99%) dispersion quantiles were removed for visualization. Simulations are based on the Kang et al.<sup>8</sup> (a) and LPS dataset (b) as reference, respectively.

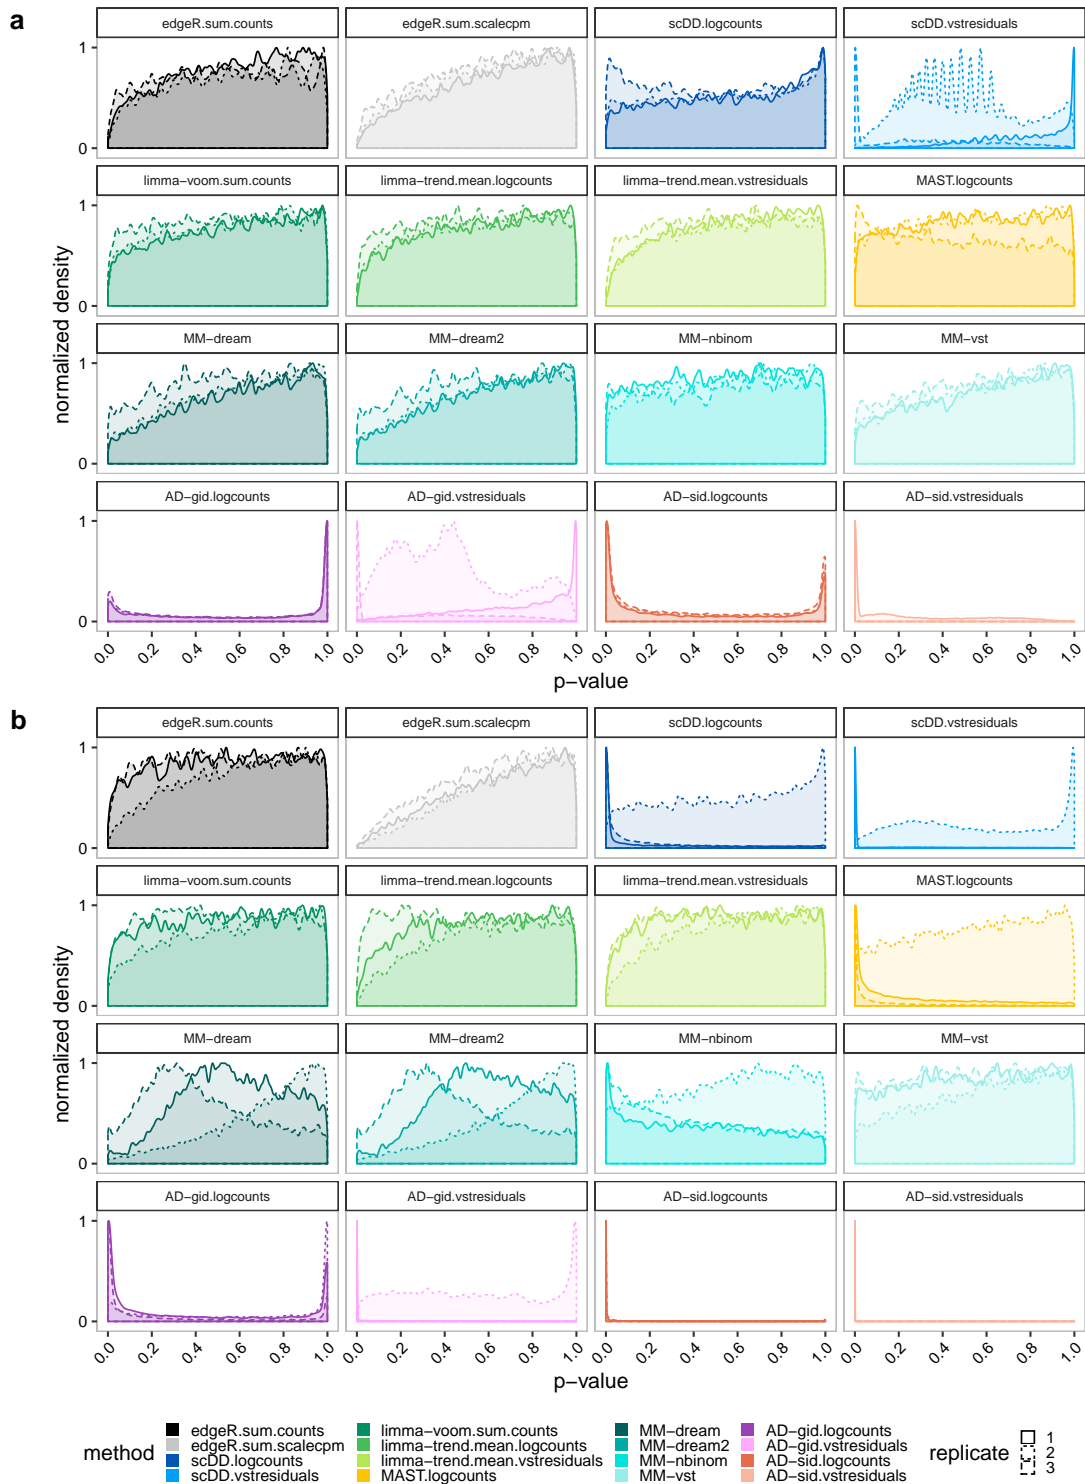

**Supplementary Figure 2: Nominal p-value distributions (densities) obtained from three null simulation replicates, stratified by method.** Each simulation run includes 3 samples per group, and 2000 genes tested across 2 clusters; 3 simulation runs are shown. Densities that are near-uniform are consistent with data lacking differential signal. Simulations are based on the Kang et al.<sup>8</sup> (a) and LPS dataset (b) as reference, respectively.

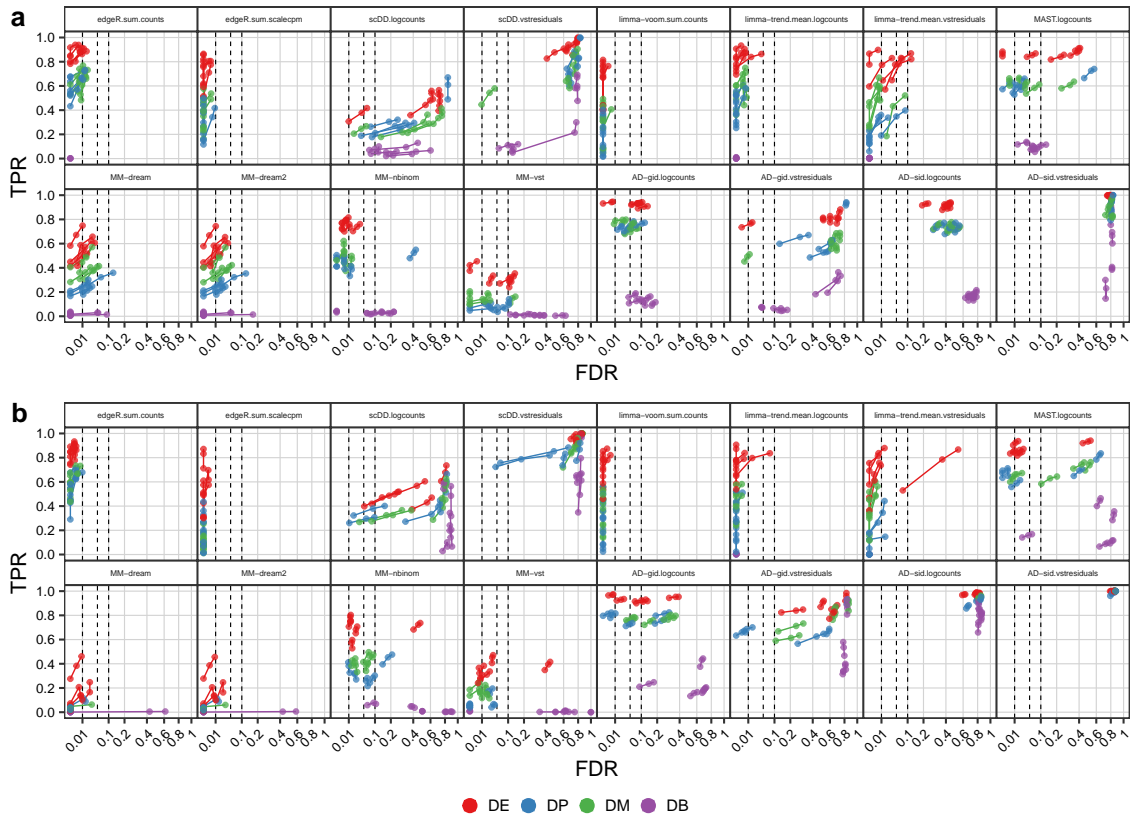

**Supplementary Figure 3: DS method performances across differential distribution and simulation replicates.** Points correspond to observed overall true positive rate (TPR) and false discovery rate (FDR) values at FDR cutoffs of 1%, 5%, and 10%; dashed lines indicate desired FDRs. Each group of inter-connected points corresponds to one simulation with 10% of DS genes (of the type indicated by their color). Simulations are based on the Kang et al.<sup>8</sup> (a) and LPS dataset (b) as reference, respectively.

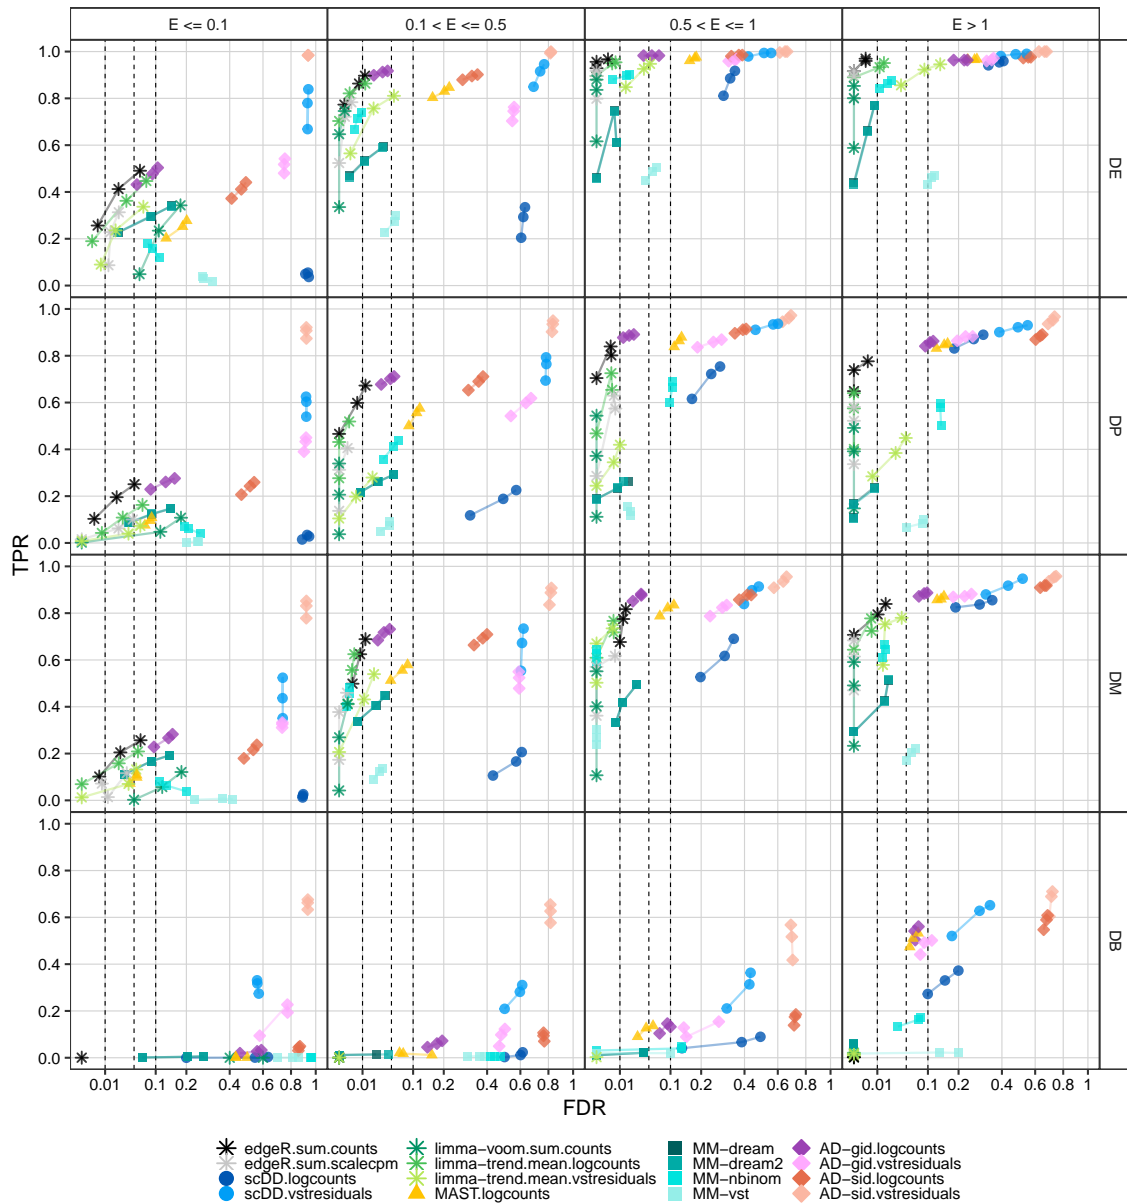

**Supplementary Figure 4: DS method performances across expression-levels and differential distribution categories; Kang et al.<sup>8</sup> dataset reference.** Points correspond to observed overall true positive rate (TPR) and false discovery rate (FDR) values at FDR cutoffs of 1%, 5%, and 10%; dashed lines indicate desired FDRs. Results were stratified into groups according to the mean of simulated expression-means across groups. For each panel, performances were averaged across 5 simulation replicates, each containing 10% of DS genes.

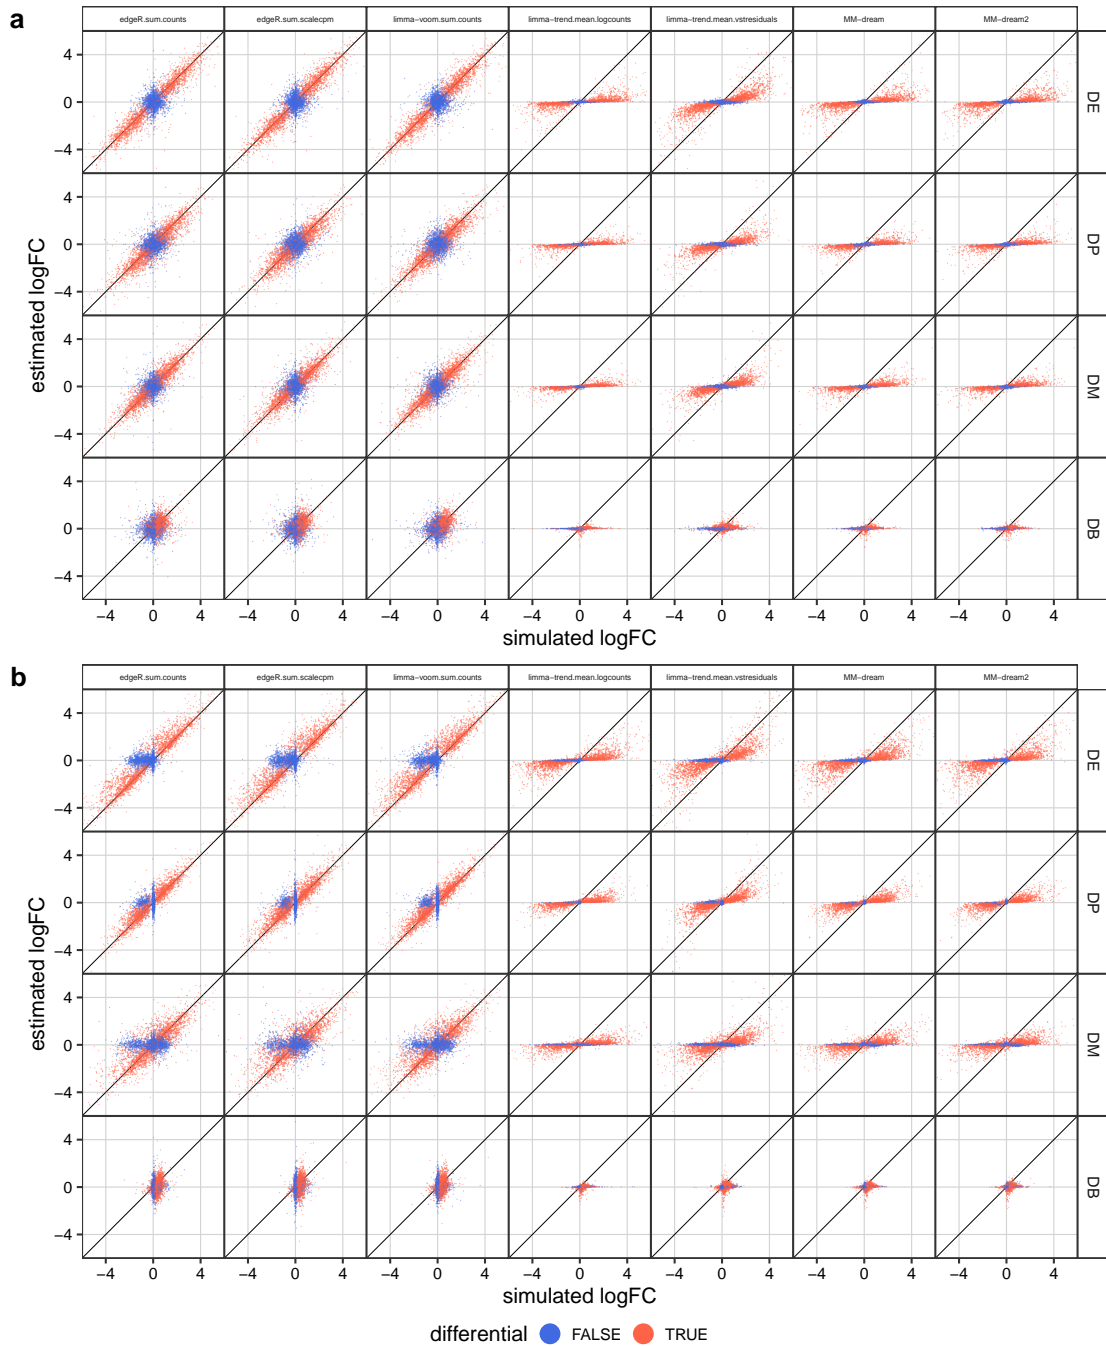

**Supplementary Figure 5: Simulated vs. estimated cross-group log-fold changes (logFC), stratified by method and gene category.** Each point corresponds to a gene-subpopulation instance; coloring corresponds to non-differential (blue) or truly differential (red). Included are only methods that return logFC estimates. For plotting, a random subset of 2'000 points was sampled per method, simulation, and color. Simulations are based on the Kang et al.<sup>8</sup> (a) and LPS dataset (b) as reference, respectively.

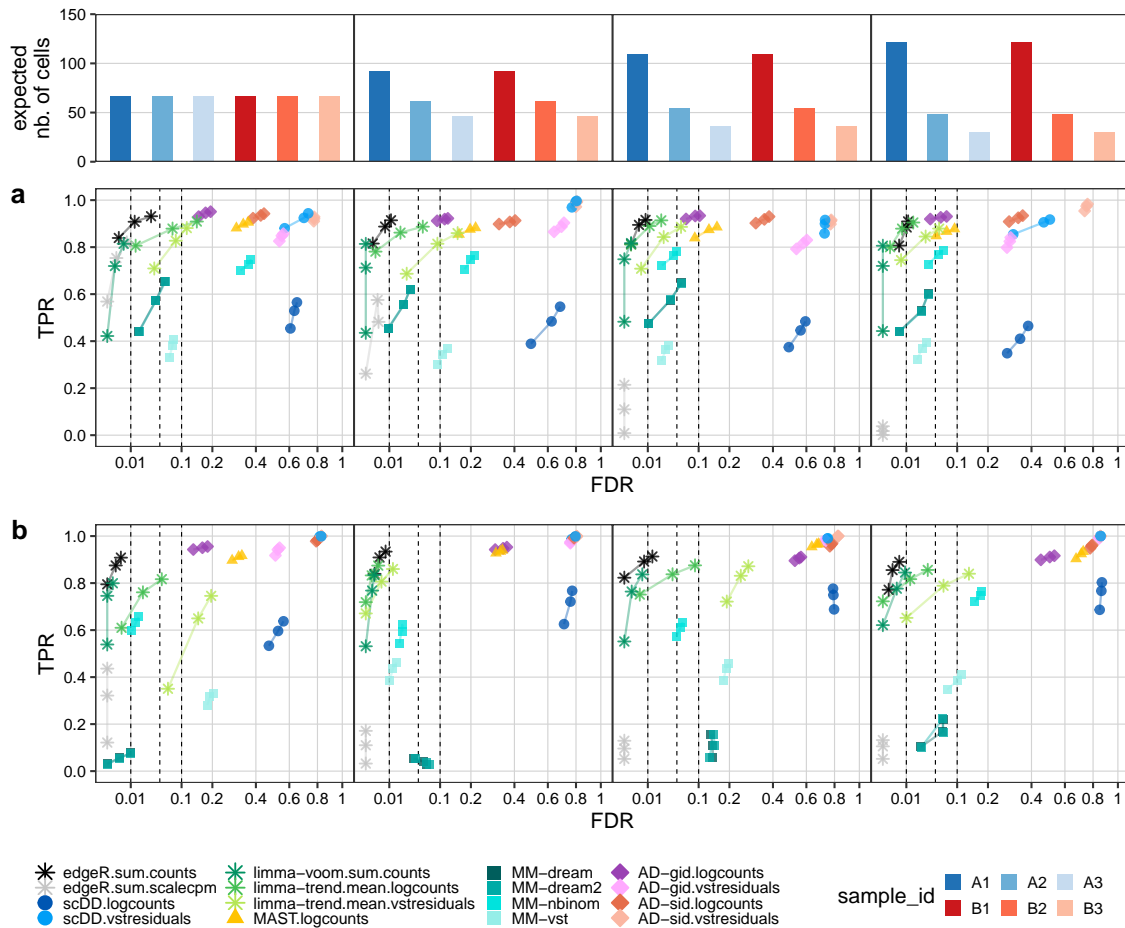

**Supplementary Figure 6: Effects of unbalanced sample sizes on DS method performances.** Points correspond to observed overall true positive rate (TPR) and false discovery rate (FDR) values at FDR cutoffs of 1%, 5%, and 10%; dashed lines indicate desired FDRs. Results were stratified into groups according to the variance of simulated sample sizes. For each panel, performances were averaged across 5 simulation replicates, each containing 10% of DS genes. Simulations are based on the Kang et al.<sup>8</sup> (a) and LPS dataset (b) as reference, respectively.

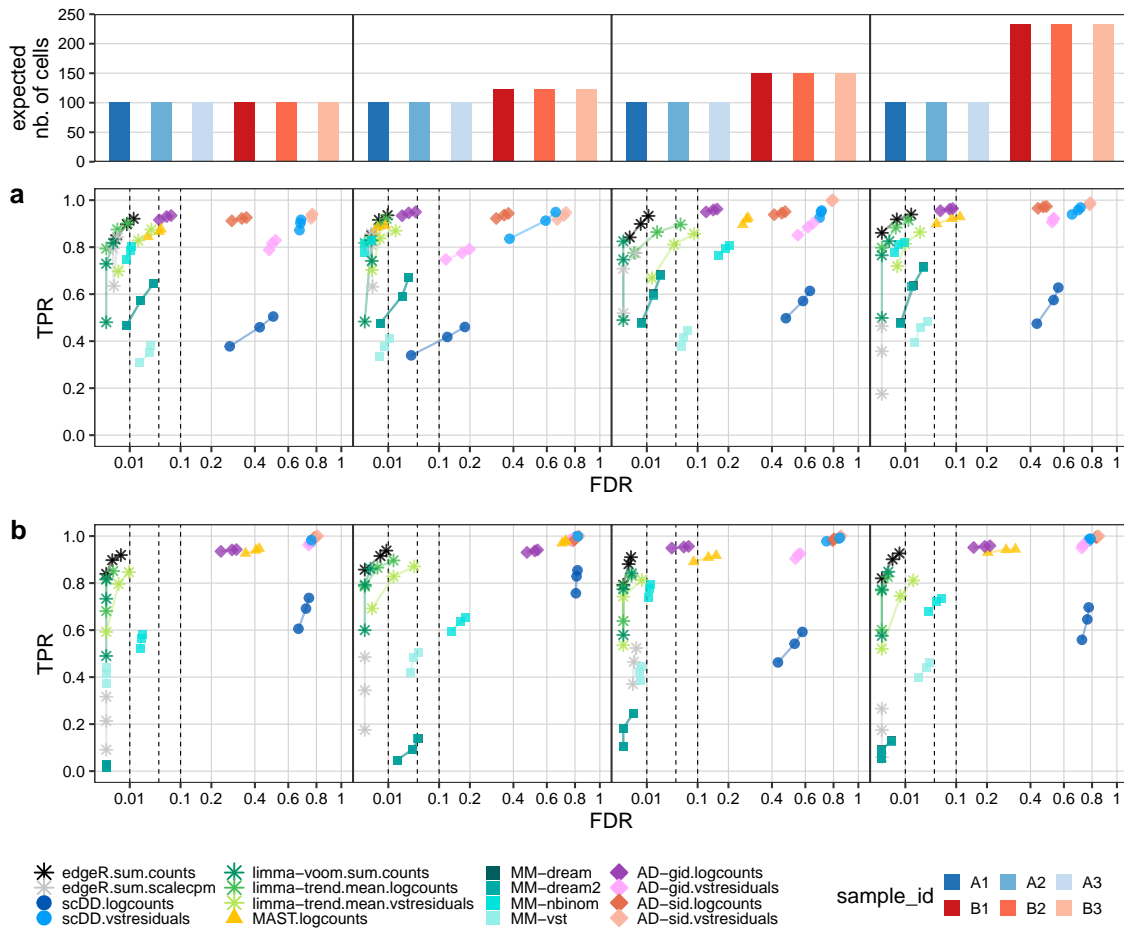

**Supplementary Figure 7: Effects of unbalanced group sizes on DS method performances.** Points correspond to observed overall true positive rate (TPR) and false discovery rate (FDR) values at FDR cutoffs of 1%, 5%, and 10%; dashed lines indicate desired FDRs. Results were stratified into groups according to the variance of simulated group sizes. For each panel, performances were averaged across 5 simulation replicates, each containing 10% of DS genes. Simulations are based on the Kang et al.<sup>8</sup> (a) and LPS dataset (b) as reference, respectively.



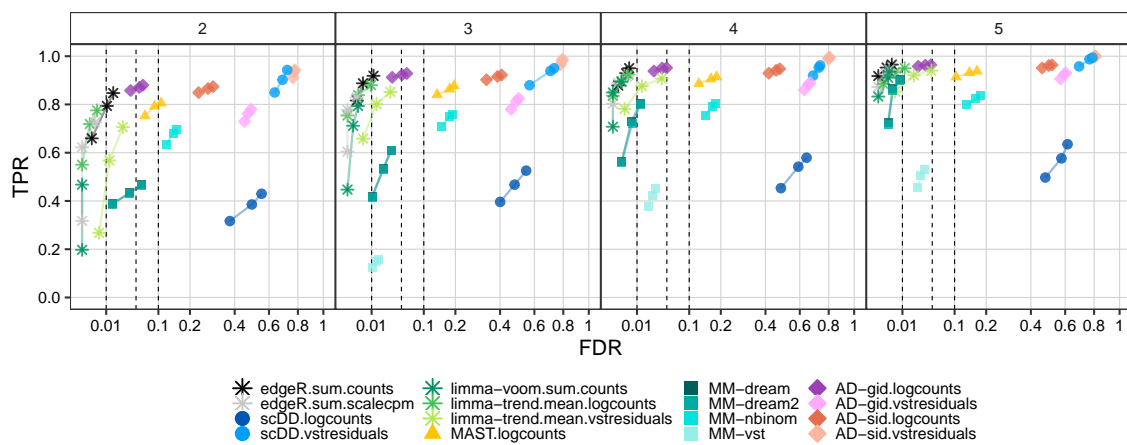

**Supplementary Figure 8: Effect of the number of replicates per group on DS method performances; Kang et al.<sup>8</sup> dataset reference.** Points correspond to observed overall true positive rate (TPR) and false discovery rate (FDR) values at FDR cutoffs of 1%, 5%, and 10%; dashed lines indicate desired FDRs. Results were stratified into groups according to the number replicates in each group. For each panel, performances were averaged across 5 simulation replicates, each containing 10% of DS genes.

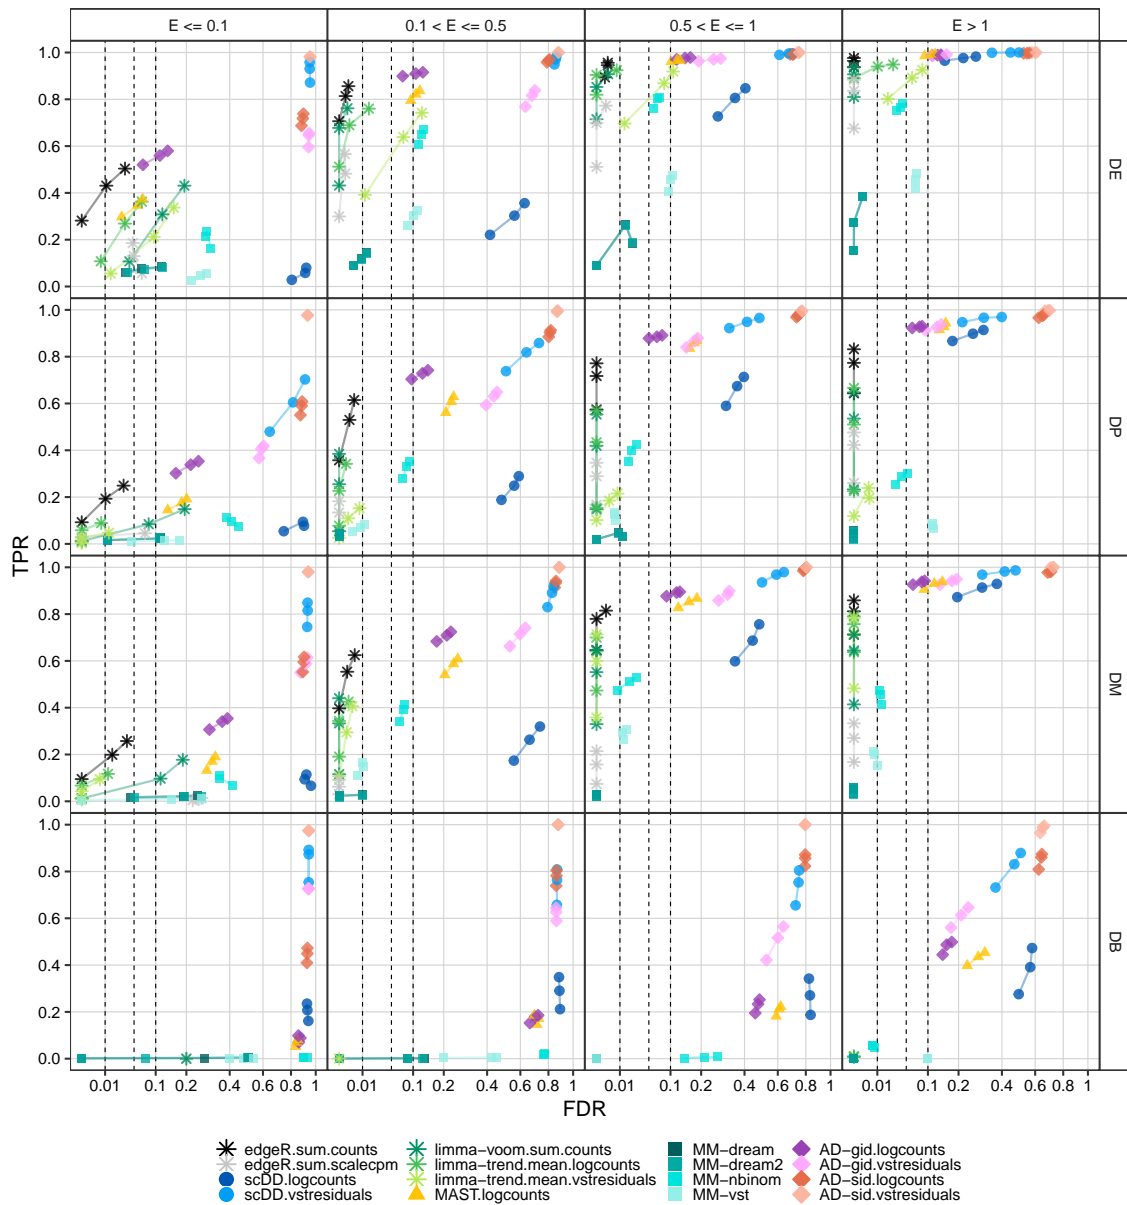

**Supplementary Figure 9: DS method performances across expression levels and differential distribution categories; LPS dataset reference.** Points correspond to observed overall true positive rate (TPR) and false discovery rate (FDR) values at FDR cutoffs of 1%, 5%, and 10%; dashed lines indicate desired FDRs. Results were stratified into groups according to the mean of simulated expression-means across groups. For each panel, performances were averaged across 5 simulation replicates, each containing 10% of DS genes (of the type specified in the right-hand side panel labels).

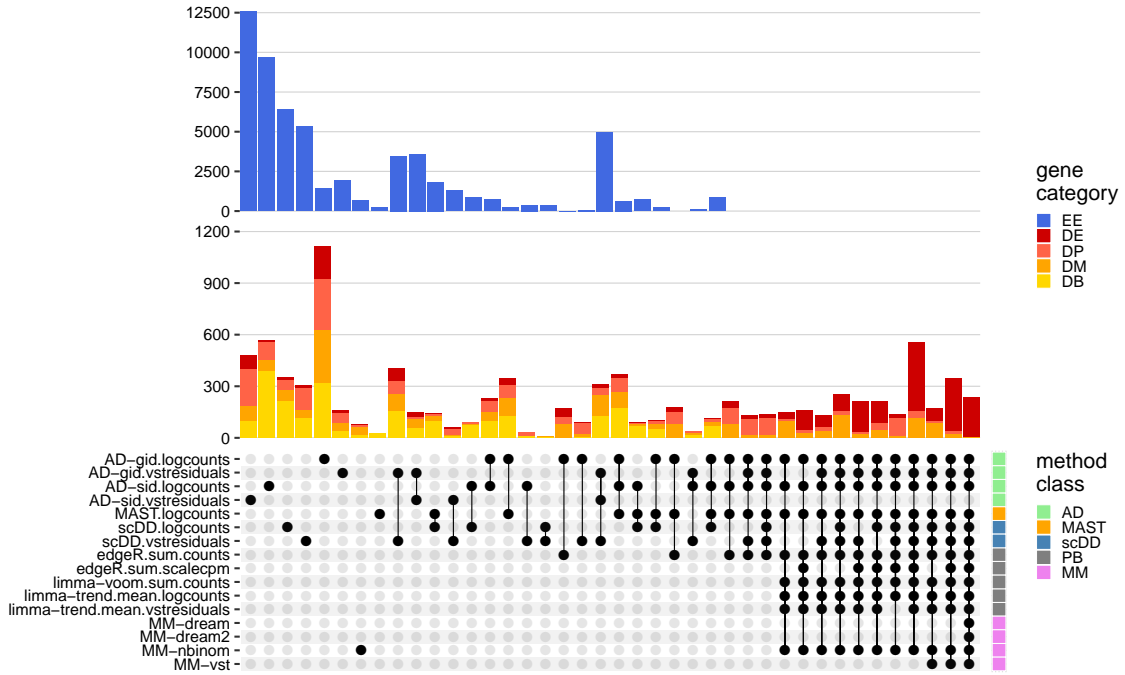

**Supplementary Figure 10: Between-method concordance; LPS dataset reference.** Upset plot obtained from intersecting the top- $n$  ranked differential genes, where  $n = \min(n_1, n_2)$ , where  $n_1 =$  number of genes simulated to be differential, and  $n_2 =$  number of genes called differential at FDR  $< 0.05$ . Shown are the 40 most frequent interactions; coloring corresponds to (true) simulated gene categories.

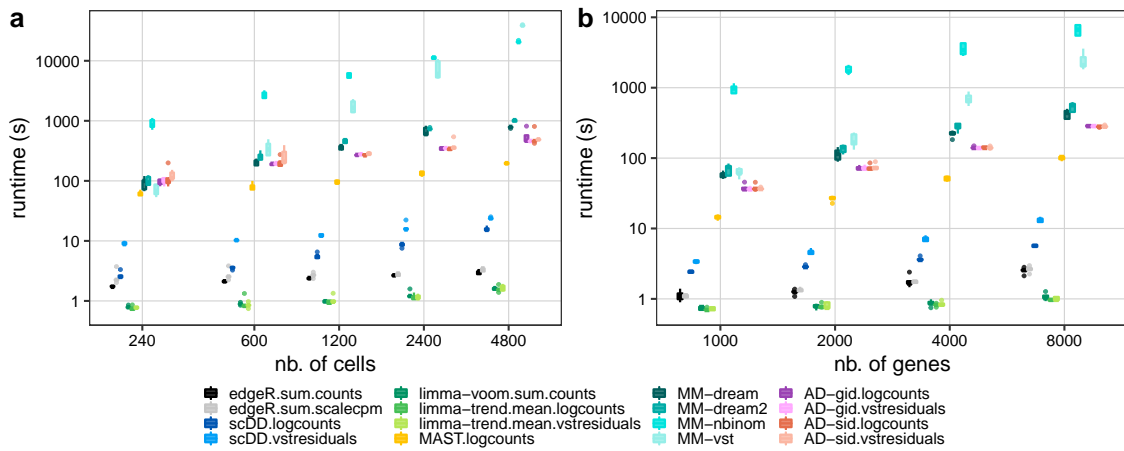

**Supplementary Figure 11: DS method runtimes vs. number of cells (a) and number of genes (b).** Included are runtimes from 5 simulation replicates per subset of cells and genes, respectively, using the Kang et al.<sup>8</sup> dataset reference; single-core computing times were recorded.

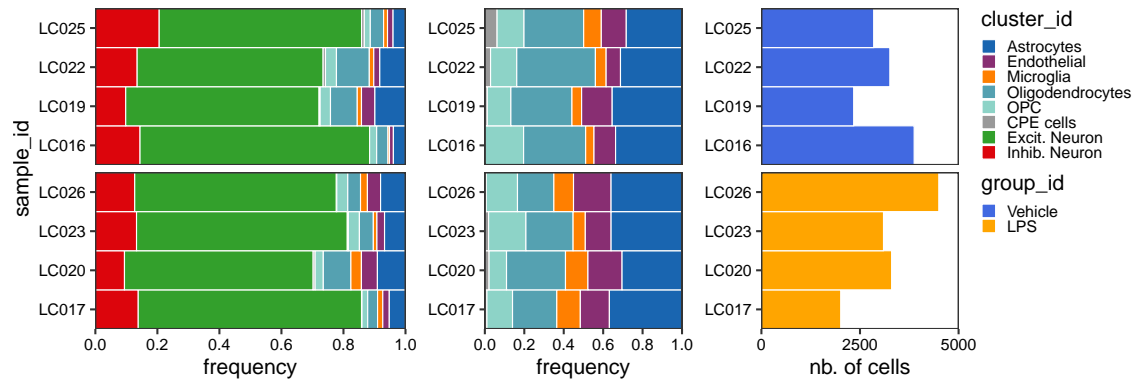

**Supplementary Figure 12: Relative and absolute subpopulation abundances for the LPS dataset.** The left panel shows sample-wise frequencies of the annotated subpopulations; the middle panel shows relative frequencies after removal of all neuronal subpopulations; the right panel shows the number of cells per sample after filtering.

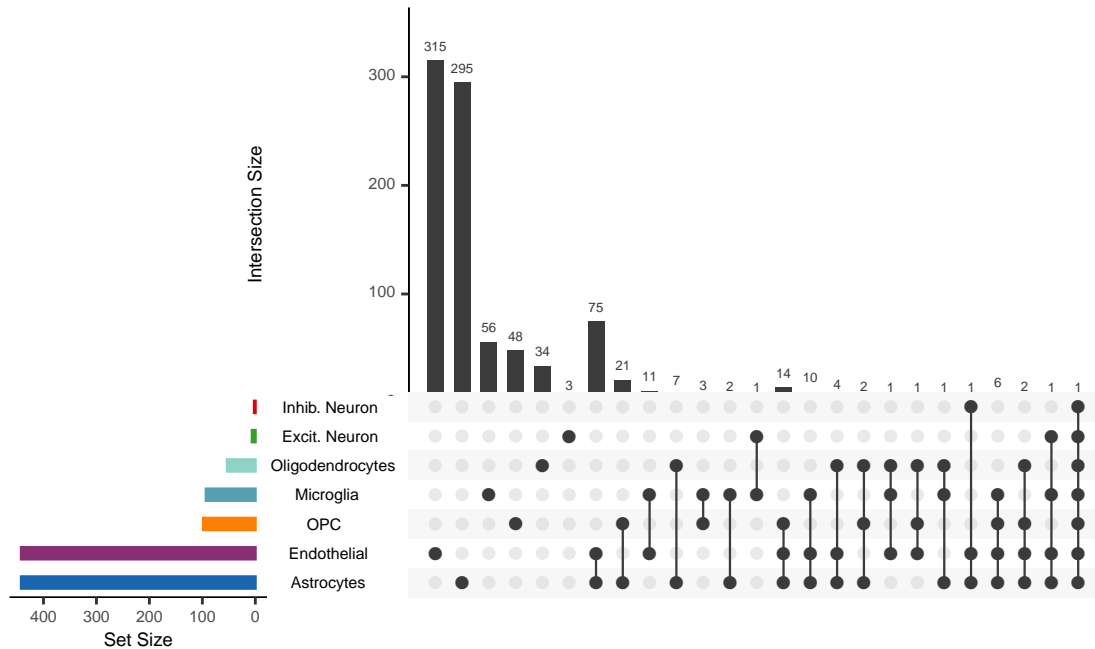

**Supplementary Figure 13: Upset plot of differentially expressed genes identified for the LPS dataset, by detected subpopulation.** Included are genes with  $FDR < 0.05$  and  $|\log FC| > 1$ ; shown are all subpopulations intersections with non-zero size.

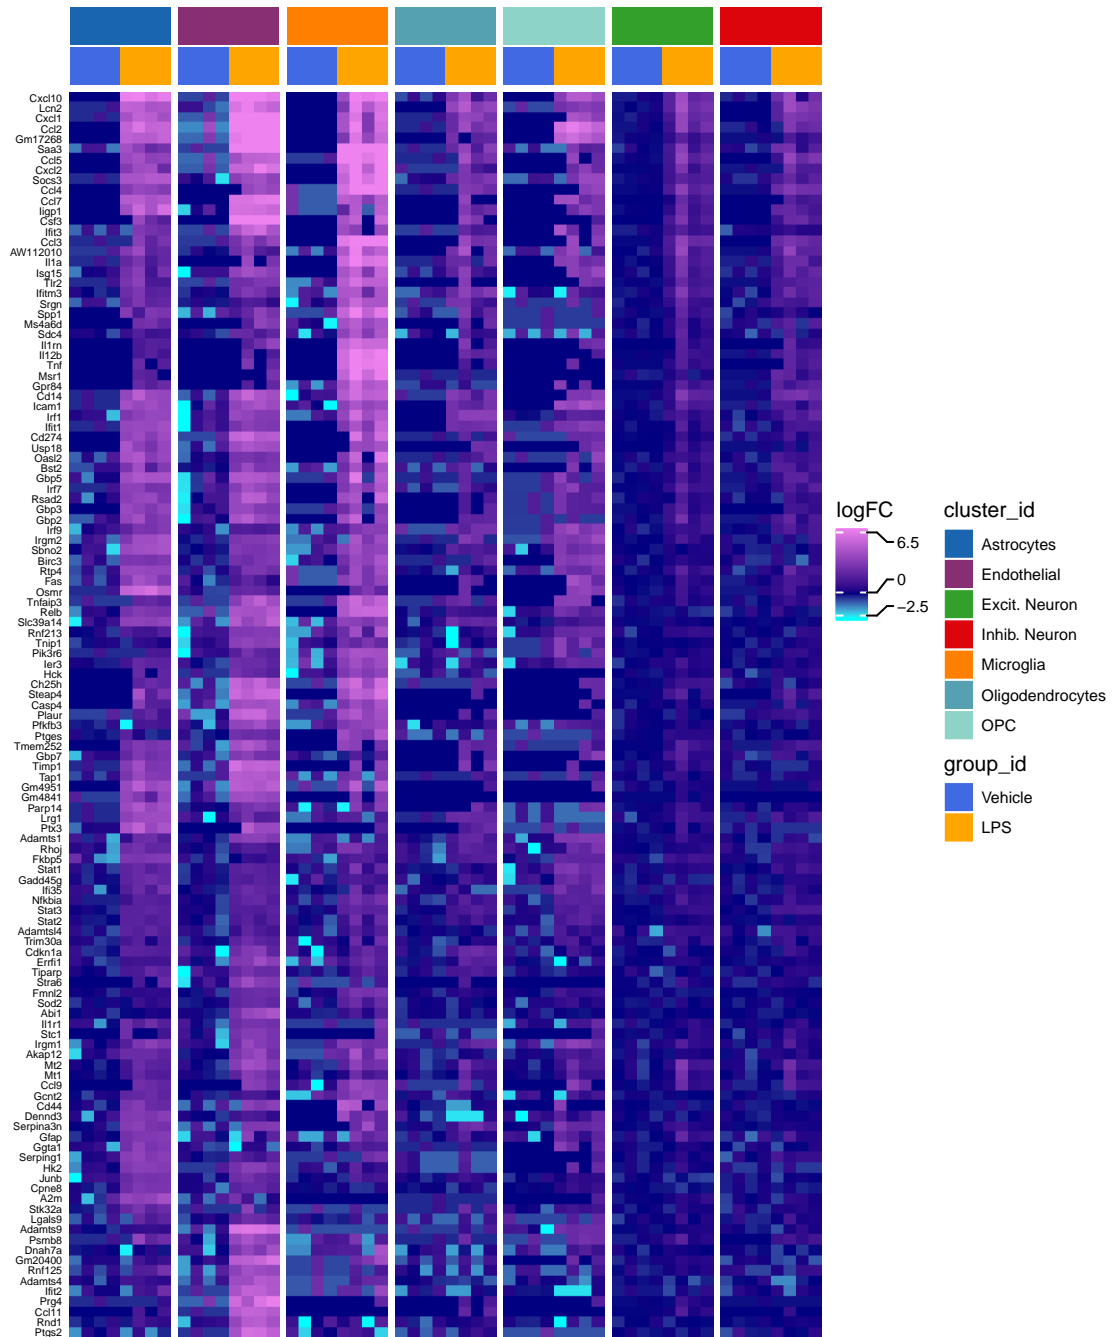

**Supplementary Figure 14: Heatmap of cross-group logFCs of DE genes with consensus cluster ID 3 for the LPS dataset.** Included are DE genes with  $FDR < 1e-4$  and  $|\logFC| > 1$ . For every gene, the displayed log-fold-change (logFC) is normalized to that gene's average expression in the vehicle group (in the corresponding subpopulation); top and bottom 1% logFC quantiles were truncated for visualization.

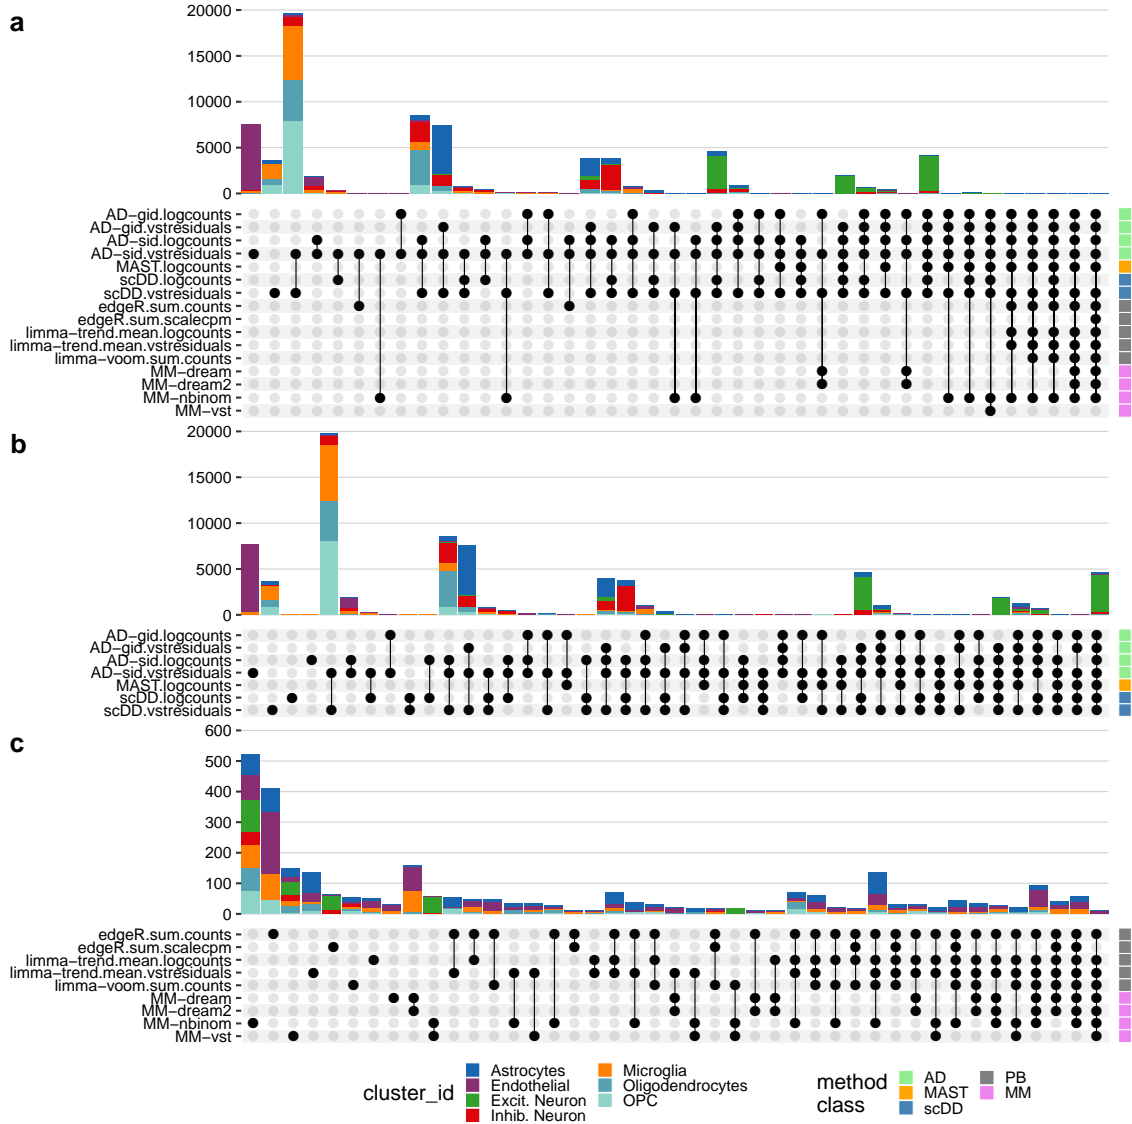

**Supplementary Figure 15: Upset plot of differential state genes detected for the LPS dataset, by method and across all subpopulations (excluding CPE cells).** Included are genes with FDR < 0.05; shown are the 40 most frequent intersections between all methods (a), AD, MAST and scDD methods (b), and aggregation- and MM-based methods (c).

## References

- [1] Mark D Robinson, Davis J McCarthy, and Gordon K Smyth. edgeR: a Bioconductor package for differential expression analysis of digital gene expression data. *Bioinformatics*, 26(1):139–140, 2010.
- [2] Matthew E Ritchie, Belinda Phipson, Di Wu, Yifang Hu, Charity W Law, Wei Shi, and Gordon K Smyth. limma powers differential expression analyses for RNA-sequencing and microarray studies. *Nucleic Acids Research*, 43(7):e47, 2015.
- [3] Gabriel E Hoffman and Eric E Schadt. variancePartition: interpreting drivers of variation in complex gene expression studies. *BMC Bioinformatics*, 17(1):483, 2016.
- [4] Gabriel E Hoffman and Panos Roussos. dream: Powerful differential expression analysis for repeated measures designs. *Bioinformatics*, 2020.
- [5] Keegan D Korthauer, Li-Fang Chu, Michael A Newton, Yuan Li, James Thomson, Ron Stewart, and Christina Kendzioriski. A statistical approach for identifying differential distributions in single-cell RNA-seq experiments. *Genome Biology*, 17(1):222, 2016.
- [6] Greg Finak, Andrew McDavid, Masanao Yajima, Jingyuan Deng, Vivian Gersuk, Alex K Shalek, Chloe K Slichter, Hannah W Miller, M Juliana McElrath, Martin Prlic, Peter S Linsley, and Raphael Gottardo. MAST: a flexible statistical framework for assessing transcriptional changes and characterizing heterogeneity in single-cell RNA sequencing data. *Genome Biology*, 16:278, 2015.
- [7] F W Scholz and M A Stephens. K-Sample Anderson-Darling tests. *Journal of the American Statistical Association*, 82(399):918–924, 1987.
- [8] Hyun Min Kang, Meena Subramaniam, Sasha Targ, Michelle Nguyen, Lenka Maliskova, Elizabeth McCarthy, Eunice Wan, Simon Wong, Lauren Byrnes, Cristina M Lanata, Rachel E Gate, Sara Mostafavi, Alexander Marson, Noah Zaitlen, Lindsey A Criswell, and Chun Jimmie Ye. Multiplexed droplet single-cell RNA-sequencing using natural genetic variation. *Nature Biotechnology*, 36(1):89–94, 2018.
